# Supplementary material for: Association of plasma and CSF cytochrome P450, soluble epoxide hydrolase and ethanolamides metabolism with Alzheimer’s disease
Source: bioRxiv or medRxiv preprint supplement (doi:10.1101/2021.03.09.21252423), 2021-03-10
Supplement: Supplementary file [file media-1.pdf]

**Table S1: Cohort Characteristics**

|                           | CSF         |                 | Plasma      |                 |
|---------------------------|-------------|-----------------|-------------|-----------------|
|                           | AD (n=150)  | Control (n=139) | AD (n=148)  | Control (n=133) |
| Male:Females              | 47%:53%     | 28%:72%         | 47%:53%     | 27%:73%         |
| Age <sup>a</sup>          | 68.2 ± 1.34 | 65.2 ± 1.38     | 68 ± 1.36   | 65.6 ± 1.53     |
| AB42 <sup>a</sup>         | 300 ± 17.4  | 536 ± 25.8      | 300 ± 17.4  | 530 ± 25.8      |
| MoCA <sup>a</sup>         | 16.4 ± 1.02 | 26.5 ± 0.523    | 16.4 ± 1.04 | 26.5 ± 0.579    |
| pTau <sup>a</sup>         | 62.8 ± 3.88 | 31.6 ± 2.38     | 62.8 ± 3.93 | 30.7 ± 2.44     |
| tTau <sup>a</sup>         | 115 ± 7.58  | 54.1 ± 4.09     | 115 ± 7.71  | 53.7 ± 4.6      |
| ApoE genotype %           |             |                 |             |                 |
| E2/E3                     | 1%          | 17%             | 1%          | 17%             |
| E2/E4                     | 2%          | 5%              | 2%          | 4%              |
| E3/E3                     | 27%         | 53%             | 27%         | 55%             |
| E3/E4                     | 51%         | 22%             | 50%         | 21%             |
| E4/E4                     | 19%         | 3%              | 20%         | 3%              |
| Race %                    |             |                 |             |                 |
| Native americans          | 1%          | -               | 1%          | -               |
| Asian                     | 1%          | 1%              | 1%          | -               |
| Black or African American | 7%          | 14%             | 7%          | 14%             |
| Caucasian or White        | 92%         | 86%             | 92%         | 86%             |

<sup>a</sup> – Results are means ± 95% confidence intervals
