# Supplementary material for: Association of plasma and CSF cytochrome P450, soluble epoxide hydrolase and ethanolamides metabolism with Alzheimer’s disease
Source: bioRxiv or medRxiv preprint supplement (doi:10.1101/2021.03.09.21252423), 2021-03-10
Supplement: Supplementary file [file media-2.pdf]

**Table S2.** T-test of predicted fasted vs predicted non-fasted in AD group for plasma and CSF metabolites.

| CSF                     |         |             |                           |                          |
|-------------------------|---------|-------------|---------------------------|--------------------------|
| Metabolite              | P value | Fold change | Mean (nM) [95%CI]         |                          |
|                         |         |             | Fasted                    | Non-fasted               |
| PGF2a                   | 0.0251  | 1.25        | 0.0274 [0.0235-0.032]     | 0.0342 [0.0301-0.0388]   |
| GCA/GCDCA               | 0.0263  | 1.18        | 1.12 [0.993-1.27]         | 1.32 [1.15-1.52]         |
| 12_13-DiHOME            | 0.03    | 1.27        | 0.0305 [0.0268-0.0347]    | 0.0387 [0.0328-0.0457]   |
| UDCA/CDCA               | 0.0472  | 0.585       | 0.978 [0.683-1.4]         | 0.572 [0.441-0.744]      |
| 12,13-DiHOME/EpOME      | 0.0626  | 1.24        | 0.0918 [0.077-0.109]      | 0.114 [0.0939-0.137]     |
| OEA                     | 0.07    | 1.13        | 0.082 [0.0757-0.0888]     | 0.0923 [0.0832-0.102]    |
| DCA/(LCA+UDCA)          | 0.0737  | 1.52        | 1.83 [1.28-2.62]          | 2.79 [2.13-3.65]         |
| TCA                     | 0.0742  | 1.38        | 0.407 [0.295-0.561]       | 0.563 [0.447-0.711]      |
| 15_16-DiHODE            | 0.0875  | 1.16        | 0.0669 [0.0567-0.0789]    | 0.0775 [0.0666-0.0902]   |
| GCA                     | 0.0925  | 1.25        | 0.887 [0.712-1.11]        | 1.11 [0.897-1.37]        |
| LA_RelAb                | 0.108   | 0.915       | 0.248 [0.228-0.269]       | 0.227 [0.212-0.244]      |
| GLCA/CDCA               | 0.114   | 0.674       | 0.0362 [0.0263-0.0497]    | 0.0244 [0.0187-0.0318]   |
| Sum(DiHOME)/Sum(EpOME)  | 0.121   | 1.2         | 0.0794 [0.066-0.0955]     | 0.0954 [0.0788-0.115]    |
| 9_10-DiHOME             | 0.122   | 1.17        | 0.0197 [0.017-0.0228]     | 0.023 [0.0194-0.0273]    |
| GDCA/GLCA               | 0.14    | 1.34        | 10.1 [7.44-13.6]          | 13.5 [10.7-17.2]         |
| UDCA                    | 0.153   | 0.693       | 1.12 [0.767-1.62]         | 0.776 [0.593-1.01]       |
| (GDCA+TDCA)/(TLCA+GLCA) | 0.154   | 1.33        | 11.4 [8.4-15.5]           | 15.2 [12-19.4]           |
| GCDCA/GLCA              | 0.169   | 1.32        | 19.2 [14.8-24.8]          | 25.4 [20.6-31.2]         |
| TUDCA/UDCA              | 0.189   | 1.46        | 0.00304 [0.00188-0.00489] | 0.00445 [0.0031-0.00639] |
| GLCA                    | 0.226   | 0.799       | 0.0413 [0.0332-0.0512]    | 0.033 [0.0269-0.0406]    |
| EPA + DHA diols         | 0.236   | 0.866       | 0.157 [0.137-0.181]       | 0.136 [0.119-0.155]      |
| 17_18-DiHETE            | 0.268   | 0.768       | 0.104 [0.0877-0.124]      | 0.0799 [0.063-0.101]     |
| 9,10-DiHOME/EpOME       | 0.269   | 1.14        | 0.0641 [0.0517-0.0794]    | 0.0728 [0.0588-0.09]     |
| GCA/GDCA                | 0.27    | 1.16        | 2.14 [1.66-2.75]          | 2.48 [1.96-3.14]         |
| 13-HOTE                 | 0.273   | 1.08        | 0.0478 [0.0419-0.0546]    | 0.0517 [0.047-0.0569]    |
| GUDCA/UDCA              | 0.291   | 1.37        | 0.0921 [0.0617-0.137]     | 0.126 [0.0904-0.176]     |
| (TUDAC+GUDCA)/UDCA      | 0.295   | 1.36        | 0.0976 [0.0656-0.145]     | 0.133 [0.0954-0.184]     |
| ALA_RelAb               | 0.297   | 0.949       | 0.272 [0.253-0.293]       | 0.258 [0.24-0.276]       |
| (GDCA+GLCA)/(TDCA)      | 0.31    | 0.905       | 11.6 [9.19-14.6]          | 10.5 [9.13-12.1]         |
| 19_20-DiHDope           | 0.333   | 0.918       | 0.0183 [0.0157-0.0213]    | 0.0168 [0.0151-0.0188]   |
| AA_RelAb                | 0.354   | 0.941       | 0.256 [0.234-0.281]       | 0.241 [0.223-0.261]      |
| CDCA                    | 0.375   | 1.19        | 1.14 [0.886-1.47]         | 1.36 [1.11-1.65]         |
| GCDCA/CDCA              | 0.376   | 0.892       | 0.693 [0.532-0.903]       | 0.618 [0.525-0.727]      |
| TCDCa                   | 0.387   | 1.11        | 0.0656 [0.051-0.0845]     | 0.0726 [0.0583-0.0903]   |
| (TCDCa+GCDCA)/CDCA      | 0.396   | 0.889       | 0.767 [0.587-1]           | 0.682 [0.578-0.805]      |
| a-MCA                   | 0.4     | 1.22        | 0.0316 [0.0212-0.047]     | 0.0387 [0.0291-0.0515]   |
| 20-HETE                 | 0.41    | 1.07        | 0.121 [0.107-0.136]       | 0.13 [0.118-0.143]       |
| T-a-MCA                 | 0.415   | 1.06        | 0.0294 [0.0229-0.0378]    | 0.0311 [0.0243-0.0399]   |
| 13-HODE                 | 0.416   | 1.03        | 1.56 [1.51-1.61]          | 1.61 [1.55-1.68]         |
| EPA_RelAb               | 0.418   | 0.915       | 0.211 [0.179-0.25]        | 0.193 [0.168-0.222]      |

|                           |       |       |                          |                          |
|---------------------------|-------|-------|--------------------------|--------------------------|
| TCDCA/GCDCA               | 0.421 | 1.04  | 0.083 [0.0683-0.101]     | 0.0867 [0.0742-0.101]    |
| GDCA                      | 0.427 | 1.08  | 0.415 [0.325-0.531]      | 0.447 [0.364-0.549]      |
| 14,15/11,12-DiHETrE       | 0.428 | 1.03  | 2.74 [2.59-2.9]          | 2.82 [2.67-2.98]         |
| 9-HOTE                    | 0.428 | 1.05  | 0.0119 [0.0106-0.0133]   | 0.0125 [0.0112-0.0139]   |
| 14_15-DiHETE              | 0.431 | 0.874 | 0.0247 [0.0196-0.0312]   | 0.0216 [0.0168-0.0279]   |
| TDCA                      | 0.432 | 1.14  | 0.0422 [0.0303-0.0588]   | 0.0479 [0.0377-0.0609]   |
| TEST                      | 0.434 | 1.11  | 0.0426 [0.0301-0.0602]   | 0.0472 [0.0358-0.0623]   |
| 17OH-PROG                 | 0.436 | 1.1   | 0.0436 [0.0381-0.0498]   | 0.0479 [0.0424-0.0541]   |
| 11_12-DiHETrE             | 0.45  | 0.954 | 0.0175 [0.0154-0.0199]   | 0.0167 [0.0151-0.0184]   |
| w-MCA/UDCA                | 0.456 | 1.34  | 0.107 [0.071-0.162]      | 0.143 [0.0968-0.211]     |
| w-MCA/T-a-MCA             | 0.528 | 0.875 | 4.07 [2.54-6.53]         | 3.56 [2.23-5.67]         |
| TDCA/GDCA                 | 0.57  | 1.05  | 0.102 [0.0823-0.126]     | 0.107 [0.0937-0.123]     |
| (TDCA+TCDCA)/(GDCA+GCDCA) | 0.587 | 1.03  | 0.0934 [0.0775-0.113]    | 0.0958 [0.0837-0.11]     |
| LEA                       | 0.59  | 1     | 0.255 [0.237-0.274]      | 0.256 [0.245-0.268]      |
| DHEA                      | 0.592 | 0.939 | 0.0163 [0.0141-0.0188]   | 0.0153 [0.0138-0.0171]   |
| DCA                       | 0.609 | 1.06  | 2.04 [1.58-2.64]         | 2.16 [1.7-2.75]          |
| (GDCA+TDCA)/(TUDCA+GUDCA) | 0.62  | 1.13  | 4.33 [2.96-6.32]         | 4.89 [3.65-6.54]         |
| TDCA/DCA                  | 0.626 | 1.07  | 0.0207 [0.0144-0.0296]   | 0.0222 [0.0174-0.0283]   |
| TDCA/DCA 2                | 0.626 | 1.07  | 0.0207 [0.0144-0.0296]   | 0.0222 [0.0174-0.0283]   |
| w-MCA                     | 0.634 | 0.925 | 0.12 [0.0816-0.176]      | 0.111 [0.0778-0.158]     |
| CRTN                      | 0.701 | 1.03  | 4.26 [3.89-4.66]         | 4.37 [4.1-4.66]          |
| GCDCA/GDCA                | 0.744 | 0.984 | 1.9 [1.52-2.39]          | 1.87 [1.51-2.32]         |
| 11-Deoxy-CTRL             | 0.746 | 0.948 | 0.0541 [0.0474-0.0617]   | 0.0513 [0.0454-0.058]    |
| GUDCA                     | 0.769 | 0.949 | 0.103 [0.0766-0.138]     | 0.0977 [0.0771-0.124]    |
| TUDCA                     | 0.769 | 1.02  | 0.00339 [0.0025-0.00459] | 0.00345 [0.00271-0.0044] |
| F2-IsoP                   | 0.79  | 0.97  | 0.301 [0.28-0.323]       | 0.292 [0.272-0.314]      |
| CRTL                      | 0.855 | 1     | 14.4 [13.1-15.9]         | 14.4 [13.5-15.4]         |
| 12(13)-EpOME              | 0.863 | 1.03  | 0.332 [0.285-0.387]      | 0.341 [0.298-0.391]      |
| TCDCA/CDCA                | 0.887 | 0.932 | 0.0575 [0.0402-0.0822]   | 0.0536 [0.0412-0.0696]   |
| GCDCA                     | 0.889 | 1.06  | 0.79 [0.658-0.949]       | 0.837 [0.723-0.97]       |
| 14_15-DiHETrE             | 0.901 | 0.981 | 0.0479 [0.043-0.0535]    | 0.047 [0.0435-0.0508]    |
| DHA_RelAb                 | 0.925 | 0.988 | 0.256 [0.224-0.293]      | 0.253 [0.224-0.286]      |
| 9-HODE                    | 0.931 | 1.02  | 0.532 [0.511-0.553]      | 0.544 [0.518-0.571]      |
| GDCA/DCA                  | 0.934 | 1.02  | 0.203 [0.166-0.249]      | 0.207 [0.179-0.239]      |
| (TDCA+GDCA)/DCA           | 0.937 | 1.01  | 0.231 [0.186-0.286]      | 0.233 [0.2-0.271]        |
| CRCTN                     | 0.954 | 0.998 | 0.414 [0.35-0.49]        | 0.413 [0.361-0.472]      |
| 9(10)-EpOME               | 0.975 | 1.03  | 0.307 [0.257-0.366]      | 0.317 [0.268-0.374]      |
| T-a-MCA/CDCA              | 0.995 | 0.891 | 0.0258 [0.0181-0.0368]   | 0.023 [0.0164-0.0322]    |

### Plasma

|              |        |      |                     |                     |
|--------------|--------|------|---------------------|---------------------|
| 12(13)-EpOME | 0.0001 | 2.79 | 2.41 [2.07-2.8]     | 6.73 [5.54-8.17]    |
| 12_13-DiHODE | 0.0001 | 2.52 | 0.209 [0.161-0.271] | 0.527 [0.448-0.62]  |
| 12_13-DiHOME | 0.0001 | 2.29 | 3.86 [3.38-4.41]    | 8.83 [7.62-10.2]    |
| 13-HOTE      | 0.0001 | 2.26 | 0.624 [0.483-0.806] | 1.41 [1.17-1.7]     |
| 15(16)-EpODE | 0.0001 | 2.17 | 2.42 [2.06-2.84]    | 5.24 [4.33-6.35]    |
| 15_16-DiHODE | 0.0001 | 2.28 | 10.9 [9.47-12.5]    | 24.9 [21.5-28.9]    |
| 9(10)-EpOME  | 0.0001 | 1.92 | 0.372 [0.305-0.454] | 0.713 [0.574-0.885] |

|                 |        |       |                      |                        |
|-----------------|--------|-------|----------------------|------------------------|
| 9_10-DiHODE     | 0.0001 | 4.33  | 0.183 [0.144-0.233]  | 0.792 [0.629-0.997]    |
| 9_10-DiHOME     | 0.0001 | 2.93  | 3.25 [2.94-3.59]     | 9.53 [8.04-11.3]       |
| 9_10-e-DiHO     | 0.0001 | 1.56  | 3.05 [2.68-3.46]     | 4.75 [4.07-5.54]       |
| 9-HOTE          | 0.0001 | 1.72  | 0.446 [0.39-0.511]   | 0.769 [0.652-0.906]    |
| AA_screen       | 0.0001 | 0.645 | 0.155 [0.139-0.172]  | 0.1 [0.0895-0.113]     |
| AEA             | 0.0001 | 0.691 | 1.49 [1.36-1.64]     | 1.03 [0.92-1.15]       |
| GCA             | 0.0001 | 3.31  | 68.6 [51.6-91.1]     | 227 [179-288]          |
| GCDCA           | 0.0001 | 2.97  | 367 [270-499]        | 1090 [896-1330]        |
| GDCA            | 0.0001 | 2.83  | 186 [125-277]        | 526 [399-694]          |
| NA-Gly          | 0.0001 | 0.619 | 0.72 [0.621-0.835]   | 0.446 [0.389-0.512]    |
| NO-Gly          | 0.0001 | 0.53  | 4.7 [4.29-5.16]      | 2.49 [2.18-2.85]       |
| OEA             | 0.0001 | 0.755 | 5.23 [4.79-5.7]      | 3.95 [3.58-4.36]       |
| TCA             | 0.0001 | 3.56  | 11.7 [8.1-16.9]      | 41.7 [32.3-53.9]       |
| TCDCA           | 0.0001 | 3.27  | 30.3 [21.6-42.7]     | 99 [77.4-127]          |
| TDCA            | 0.0001 | 2.92  | 13.7 [8.95-21]       | 40 [29.1-55.1]         |
| POEA_Screen     | 0.0002 | 0.603 | 0.119 [0.0985-0.144] | 0.0718 [0.0602-0.0856] |
| TLCA            | 0.0002 | 2.3   | 7.56 [5.18-11.1]     | 17.4 [13.2-23]         |
| DHA_screen      | 0.0003 | 0.652 | 0.149 [0.128-0.174]  | 0.0971 [0.0838-0.113]  |
| DHEA            | 0.0003 | 0.726 | 1.18 [1.04-1.34]     | 0.857 [0.78-0.941]     |
| LA_screen       | 0.0004 | 0.722 | 0.158 [0.138-0.18]   | 0.114 [0.101-0.129]    |
| 9_12_13-TriHOME | 0.0005 | 1.63  | 2.65 [2.2-3.18]      | 4.32 [3.64-5.13]       |
| GUDCA           | 0.0006 | 2.31  | 46.3 [32.8-65.4]     | 107 [80.8-142]         |
| LEA             | 0.0006 | 0.811 | 4.5 [4.13-4.91]      | 3.65 [3.39-3.93]       |
| ALA_screen      | 0.0008 | 0.646 | 0.153 [0.128-0.184]  | 0.0988 [0.0822-0.119]  |
| GLCA            | 0.0009 | 2.27  | 21.8 [14.8-32.1]     | 49.5 [38.2-64.1]       |
| 9-HODE          | 0.0015 | 1.46  | 10.9 [9.66-12.2]     | 15.9 [13.5-18.7]       |
| DGLEA           | 0.0016 | 0.726 | 0.175 [0.151-0.201]  | 0.127 [0.11-0.147]     |
| EPA_screen      | 0.0017 | 0.625 | 0.13 [0.108-0.156]   | 0.0813 [0.0672-0.0983] |
| 13-HODE         | 0.0023 | 1.45  | 14.3 [12.7-16.1]     | 20.7 [17.5-24.5]       |
| GHDCA           | 0.0023 | 1.88  | 0.8 [0.611-1.05]     | 1.5 [1.24-1.82]        |
| T-a-MCA         | 0.0037 | 1.95  | 2.62 [1.9-3.63]      | 5.1 [3.86-6.73]        |
| 5-HETE          | 0.0056 | 0.755 | 3.79 [3.35-4.29]     | 2.86 [2.52-3.23]       |
| DEA             | 0.0072 | 0.788 | 0.378 [0.325-0.44]   | 0.298 [0.266-0.334]    |
| TUDCA           | 0.0084 | 1.69  | 1.92 [1.54-2.4]      | 3.24 [2.56-4.09]       |
| 12-HETE         | 0.0137 | 0.786 | 2.81 [2.46-3.21]     | 2.21 [1.95-2.51]       |
| 15-HETE         | 0.0202 | 0.824 | 3.13 [2.81-3.49]     | 2.58 [2.28-2.92]       |
| Ibuprofen       | 0.0266 | 0.427 | 41 [21.4-78.4]       | 17.5 [10.9-27.9]       |
| w-MCA           | 0.0392 | 1.78  | 7.68 [5.53-10.7]     | 13.7 [10.2-18.4]       |
| CDCA            | 0.0401 | 1.9   | 46.7 [32.6-66.9]     | 88.5 [61.6-127]        |
| 1-LG            | 0.0436 | 1.23  | 175 [155-197]        | 215 [192-241]          |
| aLEA            | 0.0483 | 0.837 | 0.184 [0.164-0.207]  | 0.154 [0.138-0.172]    |
| DCA             | 0.0893 | 1.55  | 177 [120-259]        | 274 [206-366]          |
| TEST            | 0.0953 | 0.924 | 2.5 [1.63-3.85]      | 2.31 [1.6-3.34]        |
| 11_12-DiHETrE   | 0.0989 | 0.877 | 0.81 [0.735-0.894]   | 0.71 [0.64-0.788]      |
| 11-HETE         | 0.1022 | 0.845 | 1.61 [1.4-1.86]      | 1.36 [1.19-1.56]       |
| 9(10)-EpODE     | 0.1086 | 1.32  | 0.145 [0.112-0.187]  | 0.192 [0.146-0.253]    |
| 9-HETE          | 0.1162 | 0.803 | 1.32 [1.12-1.57]     | 1.06 [0.894-1.27]      |

|               |        |       |                        |                        |
|---------------|--------|-------|------------------------|------------------------|
| 2-LG          | 0.1187 | 1.19  | 46.4 [41-52.5]         | 55 [49.4-61.3]         |
| 13-KODE       | 0.1265 | 0.732 | 1.42 [1.16-1.74]       | 1.04 [0.809-1.33]      |
| 11(12)-EpETrE | 0.1495 | 0.697 | 0.0755 [0.0608-0.0938] | 0.0526 [0.0415-0.0665] |
| 14(15)-EpETrE | 0.1565 | 1.07  | 0.106 [0.0826-0.136]   | 0.113 [0.0936-0.137]   |
| PGF2a         | 0.1565 | 1.35  | 0.416 [0.313-0.554]    | 0.56 [0.473-0.664]     |
| 14-HDoHE      | 0.1646 | 0.804 | 1.58 [1.19-2.11]       | 1.27 [0.96-1.67]       |
| CA            | 0.1729 | 1.66  | 19.3 [13.6-27.4]       | 32 [21.7-47.2]         |
| Progesterone  | 0.1736 | 1.26  | 0.37 [0.317-0.432]     | 0.466 [0.39-0.558]     |
| EPEA_Screen   | 0.1844 | 0.808 | 0.0873 [0.0704-0.108]  | 0.0705 [0.0581-0.0855] |
| 14_15-DiHETrE | 0.2208 | 0.922 | 1 [0.912-1.1]          | 0.922 [0.83-1.02]      |
| 8_9-DiHETrE   | 0.249  | 0.742 | 0.365 [0.279-0.476]    | 0.271 [0.215-0.342]    |
| PGE2          | 0.2637 | 1.22  | 0.16 [0.13-0.197]      | 0.195 [0.16-0.238]     |
| 5_6-DiHETrE   | 0.2763 | 0.875 | 0.51 [0.449-0.581]     | 0.446 [0.384-0.518]    |
| Naproxen      | 0.3047 | 0.565 | 191 [57.1-637]         | 108 [40-294]           |
| 5-HEPE        | 0.3191 | 0.82  | 0.572 [0.463-0.706]    | 0.469 [0.387-0.568]    |
| b-MCA         | 0.3361 | 0.813 | 2.41 [1.79-3.24]       | 1.96 [1.55-2.49]       |
| 12-HEPE       | 0.4055 | 0.9   | 0.311 [0.252-0.383]    | 0.28 [0.236-0.332]     |
| Acetaminophen | 0.4853 | 1.11  | 5.52 [2.81-10.8]       | 6.14 [3.36-11.2]       |
| 1-AG          | 0.5174 | 1.07  | 19 [16.9-21.4]         | 20.4 [18.2-22.8]       |
| UDCA          | 0.5175 | 0.877 | 91.6 [62.8-134]        | 80.3 [59.2-109]        |
| LCA           | 0.5555 | 1.12  | 30 [23.7-38]           | 33.6 [27.2-41.5]       |
| 9-HEPE        | 0.5787 | 1.02  | 0.158 [0.111-0.225]    | 0.161 [0.132-0.196]    |
| 1-OG          | 0.595  | 1.09  | 282 [252-316]          | 308 [276-344]          |
| 2-AG          | 0.6627 | 1.07  | 4.77 [4.24-5.37]       | 5.12 [4.49-5.84]       |
| CRCTN         | 0.6773 | 1.09  | 0.743 [0.58-0.953]     | 0.808 [0.693-0.943]    |
| CRTN          | 0.6992 | 0.966 | 4.76 [3.71-6.11]       | 4.6 [3.85-5.49]        |
| 4-HDoHE       | 0.717  | 0.951 | 0.649 [0.549-0.768]    | 0.617 [0.506-0.751]    |
| 17_18-DiHETE  | 0.7633 | 1.01  | 5.23 [4.32-6.34]       | 5.29 [4.49-6.23]       |
| 15-HEPE       | 0.7908 | 0.925 | 0.292 [0.239-0.356]    | 0.27 [0.223-0.327]     |
| 8-HETE        | 0.8305 | 0.992 | 2.51 [2.16-2.93]       | 2.49 [2.18-2.84]       |
| TXB2          | 0.8681 | 1.03  | 0.231 [0.183-0.292]    | 0.239 [0.193-0.298]    |
| 19_20-DiHDoPE | 0.8845 | 0.985 | 2.03 [1.78-2.33]       | 2 [1.8-2.23]           |
| 17-OH PROG    | 0.8963 | 1.03  | 0.951 [0.764-1.18]     | 0.978 [0.805-1.19]     |
| PGD2          | 0.9007 | 0.928 | 0.264 [0.176-0.397]    | 0.245 [0.178-0.338]    |
| CRTL          | 0.9039 | 1.17  | 207 [158-272]          | 242 [217-270]          |
| 2-OG          | 0.9312 | 1.05  | 34.1 [29.8-39.1]       | 35.9 [31.6-40.7]       |
| 5_15-DiHETE   | 0.9689 | 1.1   | 0.105 [0.0756-0.146]   | 0.115 [0.0904-0.146]   |
| DHEAS         | 0.9727 | 1.24  | 1220 [923-1610]        | 1510 [1310-1740]       |
| F2-IsoP       | 0.9741 | 0.959 | 6.36 [5.33-7.59]       | 6.1 [5.34-6.98]        |
