# Supplementary material for: Association of plasma and CSF cytochrome P450, soluble epoxide hydrolase and ethanolamides metabolism with Alzheimer’s disease
Source: bioRxiv or medRxiv preprint supplement (doi:10.1101/2021.03.09.21252423), 2021-03-10
Supplement: Supplementary file [file media-3.pdf]

**Table S3.** The mean values and t-test and two-way ANOVA interaction p-values for all detected metabolites in plasma. P-values < 0.05 are colored red, p-values > 0.05 < 0.1 are colored orange.

| Metabolite information                       |                |         |         | p-values                             |                                      |                                    |        | Mean [95%CI] Uning subjects with p of fasted >60% |                          |
|----------------------------------------------|----------------|---------|---------|--------------------------------------|--------------------------------------|------------------------------------|--------|---------------------------------------------------|--------------------------|
|                                              |                |         |         | Uning subjects with p of fasted >60% |                                      |                                    |        | p-value AD vs Control All subjects                | Control mean [95%CI]     |
| Metabolite name                              | Chemical class | Enzyme  | Units   | p-value AD vs Control                | p-value Gender x Disease interaction | p-value Race x Disease interaction |        |                                                   |                          |
| Oxylipins, endocannabinoids, PUFAS and NSADs |                |         |         |                                      |                                      |                                    |        |                                                   |                          |
| TXB2                                         | TX             | COX1    | nM      | 0.108                                | 0.516                                | 0.309                              | 0.0435 | 0.327 [0.262 - 0.408]                             | 0.234 [0.178 - 0.307]    |
| PGE2                                         | PGs            | COX2    | nM      | 0.112                                | 0.275                                | 0.236                              | 0.0459 | 0.209 [0.182 - 0.238]                             | 0.16 [0.13 - 0.197]      |
| PGD2                                         | PGs            | COX2    | nM      | 0.0346                               | 0.327                                | 0.0459                             | 0.0037 | 0.355 [0.286 - 0.441]                             | 0.225 [0.142 - 0.355]    |
| PGF2a                                        | PGs            | COX2    | nM      | 0.0163                               | 0.481                                | 0.609                              | 0.0632 | 0.65 [0.525 - 0.805]                              | 0.387 [0.284 - 0.527]    |
| F2-IsoP                                      | PGs            | Auto-ox | nM      | 0.0059                               | 0.407                                | 0.923                              | 0.0001 | 8.22 [7.15 - 9.45]                                | 6.36 [5.33 - 7.59]       |
| 5_15-DiHETE                                  | Diol           | LOX     | nM      | 0.272                                | 0.278                                | 0.381                              | 0.383  | 0.0998 [0.0777 - 0.128]                           | 0.106 [0.0717 - 0.158]   |
| 9_12_13-TriHOME                              | Triol          | LOX     | nM      | 0.0006                               | 0.828                                | 0.165                              | 0.0618 | 4.38 [3.75 - 5.1]                                 | 2.65 [2.2 - 3.18]        |
| 9_10-e-DiHO                                  | vic-Diol       | SEH     | nM      | 0.0236                               | 0.905                                | 0.605                              | 0.986  | 3.97 [3.56 - 4.42]                                | 3.05 [2.68 - 3.46]       |
| 12_13-DiHOME                                 | vic-Diol       | sEH     | nM      | 0.103                                | 0.7                                  | 0.495                              | 0.0761 | 4.71 [4.26 - 5.21]                                | 3.86 [3.38 - 4.41]       |
| 9_10-DiHOME                                  | vic-Diol       | sEH     | nM      | 0.413                                | 0.442                                | 0.377                              | 0.0001 | 3.16 [2.89 - 3.45]                                | 3.25 [2.94 - 3.59]       |
| 15_16-DiHODE                                 | vic-Diol       | sEH     | nM      | 0.813                                | 0.858                                | 0.849                              | 0.0001 | 11.6 [10.5 - 12.8]                                | 10.9 [9.47 - 12.5]       |
| 12_13-DiHODE                                 | vic-Diol       | sEH     | nM      | 0.711                                | 0.26                                 | 0.502                              | 0.0001 | 0.218 [0.176 - 0.27]                              | 0.202 [0.151 - 0.27]     |
| 9_10-DiHODE                                  | vic-Diol       | sEH     | nM      | 0.909                                | 0.587                                | 0.235                              | 0.0001 | 0.192 [0.162 - 0.228]                             | 0.184 [0.141 - 0.24]     |
| 14_15-DiHETrE                                | vic-Diol       | sEH     | nM      | 0.0004                               | 0.305                                | 0.833                              | 0.0017 | 0.833 [0.784 - 0.886]                             | 1 [0.912 - 1.1]          |
| 11_12-DiHETrE                                | vic-Diol       | sEH     | nM      | 0.0092                               | 0.23                                 | 0.757                              | 0.0538 | 0.709 [0.67 - 0.75]                               | 0.81 [0.735 - 0.894]     |
| 8_9-DiHETrE                                  | vic-Diol       | sEH     | nM      | 0.205                                | 0.762                                | 0.97                               | 0.87   | 0.266 [0.203 - 0.347]                             | 0.339 [0.24 - 0.478]     |
| 5_6-DiHETrE                                  | vic-Diol       | sEH     | nM      | 0.47                                 | 0.507                                | 0.653                              | 0.0223 | 0.565 [0.513 - 0.622]                             | 0.51 [0.449 - 0.581]     |
| 17_18-DiHETE                                 | vic-Diol       | sEH     | nM      | 0.0001                               | 0.118                                | 0.632                              | 0.0001 | 1.73 [1.32 - 2.27]                                | 5.23 [4.32 - 6.34]       |
| 19_20-DiHDoPE                                | vic-Diol       | sEH     | nM      | 0.802                                | 0.0983                               | 0.938                              | 0.623  | 2 [1.83 - 2.18]                                   | 2.03 [1.78 - 2.33]       |
| 13-HODE                                      | R-OH           | LOX     | nM      | 0.0793                               | 0.305                                | 0.96                               | 0.76   | 16.8 [15.4 - 18.3]                                | 14.3 [12.7 - 16.1]       |
| 9-HODE                                       | R-OH           | LOX     | nM      | 0.563                                | 0.428                                | 0.815                              | 0.128  | 11.9 [10.9 - 13]                                  | 10.9 [9.66 - 12.2]       |
| 13-HOTE                                      | R-OH           | LOX     | nM      | 0.686                                | 0.299                                | 0.907                              | 0.0082 | 0.709 [0.601 - 0.836]                             | 0.624 [0.483 - 0.806]    |
| 9-HOTE                                       | R-OH           | LOX     | nM      | 0.863                                | 0.976                                | 0.0958                             | 0.0077 | 0.479 [0.424 - 0.542]                             | 0.446 [0.39 - 0.511]     |
| 15-HETE                                      | R-OH           | LOX     | nM      | 0.769                                | 0.316                                | 0.639                              | 0.241  | 3.17 [2.82 - 3.55]                                | 3.13 [2.81 - 3.49]       |
| 12-HETE                                      | R-OH           | LOX     | nM      | 0.224                                | 0.751                                | 0.0638                             | 0.0005 | 3.35 [2.95 - 3.81]                                | 2.81 [2.46 - 3.21]       |
| 11-HETE                                      | R-OH           | LOX     | nM      | 0.224                                | 0.619                                | 0.966                              | 0.0021 | 2.01 [1.75 - 2.3]                                 | 1.61 [1.4 - 1.86]        |
| 9-HETE                                       | R-OH           | LOX     | nM      | 0.168                                | 0.57                                 | 0.464                              | 0.0039 | 1.73 [1.47 - 2.03]                                | 1.32 [1.12 - 1.57]       |
| 8-HETE                                       | R-OH           | LOX     | nM      | 0.0032                               | 0.984                                | 0.659                              | 0.0001 | 3.64 [3.18 - 4.17]                                | 2.51 [2.16 - 2.93]       |
| 5-HETE                                       | R-OH           | LOX     | nM      | 0.0593                               | 0.648                                | 0.272                              | 0.0001 | 5.02 [4.43 - 5.68]                                | 3.79 [3.35 - 4.29]       |
| 15-HEPE                                      | R-OH           | LOX     | nM      | 0.116                                | 0.235                                | 0.979                              | 0.0059 | 0.345 [0.282 - 0.422]                             | 0.294 [0.24 - 0.359]     |
| 12-HEPE                                      | R-OH           | LOX     | nM      | 0.0073                               | 0.598                                | 0.792                              | 0.0001 | 0.459 [0.39 - 0.539]                              | 0.313 [0.253 - 0.387]    |
| 9-HEPE                                       | R-OH           | Auto-ox | nM      | 0.0105                               | 0.93                                 | 0.174                              | 0.0001 | 0.319 [0.256 - 0.397]                             | 0.158 [0.103 - 0.241]    |
| 5-HEPE                                       | R-OH           | LOX     | nM      | 0.0028                               | 0.705                                | 0.754                              | 0.0001 | 0.908 [0.771 - 1.07]                              | 0.572 [0.463 - 0.706]    |
| 14-HDoHE                                     | R-OH           | LOX     | nM      | 0.0171                               | 0.324                                | 0.574                              | 0.0002 | 2.4 [2 - 2.88]                                    | 1.61 [1.17 - 2.21]       |
| 4-HDoHE                                      | R-OH           | LOX     | nM      | 0.0008                               | 0.402                                | 0.0713                             | 0.0001 | 1.03 [0.886 - 1.21]                               | 0.651 [0.545 - 0.777]    |
| 13-KODE                                      | R=O            | ADH     | nM      | 0.349                                | 0.614                                | 0.261                              | 0.0061 | 1.74 [1.43 - 2.12]                                | 1.46 [1.18 - 1.81]       |
| 12(13)-EpOME                                 | Epox           | CYP     | nM      | 0.405                                | 0.719                                | 0.192                              | 0.0001 | 2.28 [2.03 - 2.56]                                | 2.41 [2.07 - 2.8]        |
| 9(10)-EpOME                                  | Epox           | CYP     | nM      | 0.026                                | 0.9                                  | 0.452                              | 0.0001 | 0.29 [0.244 - 0.346]                              | 0.369 [0.3 - 0.453]      |
| 15(16)-EpODE                                 | Epox           | CYP     | nM      | 0.206                                | 0.7                                  | 0.414                              | 0.0001 | 2.14 [1.9 - 2.4]                                  | 2.42 [2.06 - 2.84]       |
| 9(10)-EpODE                                  | Epox           | CYP     | nM      | 0.456                                | 0.283                                | 0.16                               | 0.63   | 0.174 [0.147 - 0.206]                             | 0.146 [0.11 - 0.193]     |
| 14(15)-EpETrE                                | Epox           | CYP     | nM      | 0.333                                | 0.101                                | 0.496                              | 0.076  | 0.0851 [0.0634 - 0.114]                           | 0.1 [0.074 - 0.136]      |
| 11(12)-EpETrE                                | Epox           | CYP     | nM      | 0.3                                  | 0.349                                | 0.259                              | 0.616  | 0.0574 [0.0439 - 0.0751]                          | 0.0705 [0.0507 - 0.0979] |
| LA                                           | PUFA           | Diet    | Rel Abs | 0.0922                               | 0.273                                | 0.35                               | 0.723  | 0.154 [0.143 - 0.166]                             | 0.158 [0.138 - 0.18]     |
| ALA                                          | PUFA           | Diet    | Rel Abs | 0.102                                | 0.435                                | 0.703                              | 0.574  | 0.146 [0.131 - 0.162]                             | 0.153 [0.128 - 0.184]    |
| AA                                           | PUFA           | D5D     | Rel Abs | 0.0125                               | 0.328                                | 0.439                              | 0.723  | 0.138 [0.126 - 0.151]                             | 0.155 [0.139 - 0.172]    |
| EPA                                          | PUFA           | D6D     | Rel Abs | 0.324                                | 0.0928                               | 0.611                              | 0.0668 | 0.12 [0.105 - 0.138]                              | 0.13 [0.108 - 0.156]     |
| DHA                                          | PUFA           | D6D     | Rel Abs | 0.419                                | 0.0253                               | 0.913                              | 0.0334 | 0.147 [0.133 - 0.162]                             | 0.149 [0.128 - 0.174]    |
| OEA                                          | Acyl-EA        | PLD     | nM      | 0.0004                               | 0.647                                | 0.0846                             | 0.0001 | 7.31 [6.63 - 8.06]                                | 5.23 [4.79 - 5.7]        |
| LEA                                          | Acyl-EA        | PLD     | nM      | 0.278                                | 0.527                                | 0.924                              | 0.732  | 4.26 [3.9 - 4.65]                                 | 4.5 [4.13 - 4.91]        |
| aLEA                                         | Acyl-EA        | PLD     | nM      | 0.72                                 | 0.321                                | 0.437                              | 0.894  | 0.179 [0.161 - 0.199]                             | 0.184 [0.164 - 0.207]    |
| DGLEA                                        | Acyl-EA        | PLD     | nM      | 0.002                                | 0.247                                | 0.919                              | 0.0001 | 0.245 [0.216 - 0.276]                             | 0.175 [0.151 - 0.201]    |
| AEA                                          | Acyl-EA        | PLD     | nM      | 0.0002                               | 0.968                                | 0.502                              | 0.0001 | 2.2 [1.97 - 2.46]                                 | 1.49 [1.36 - 1.64]       |
| DEA                                          | Acyl-EA        | PLD     | nM      | 0.0001                               | 0.791                                | 0.169                              | 0.0001 | 0.664 [0.571 - 0.771]                             | 0.378 [0.325 - 0.44]     |
| DHEA                                         | Acyl-EA        | PLD     | nM      | 0.0003                               | 0.124                                | 0.173                              | 0.0001 | 1.67 [1.5 - 1.86]                                 | 1.18 [1.04 - 1.34]       |

|               |          |           |         |        |       |        |        |                        |                         |
|---------------|----------|-----------|---------|--------|-------|--------|--------|------------------------|-------------------------|
| POEA          | Acyl-EA  | PLD       | Rel Abs | 0.445  | 0.954 | 0.265  | 0.0736 | 0.127 [0.111 - 0.145]  | 0.119 [0.0985 - 0.144]  |
| EPEA          | Acyl-EA  | PLD       | Rel Abs | 0.621  | 0.597 | 1      | 0.0257 | 0.102 [0.0878 - 0.119] | 0.0873 [0.0704 - 0.108] |
| NO-Gly        | Acyl-Gly | FAAH      | nM      | 0.215  | 0.401 | 0.764  | 0.0001 | 5.21 [4.8 - 5.66]      | 4.7 [4.29 - 5.16]       |
| NA-Gly        | Acyl-Gly | FAAH      | nM      | 0.126  | 0.791 | 0.905  | 0.951  | 0.609 [0.533 - 0.695]  | 0.72 [0.621 - 0.835]    |
| 1-AG and 2-AG | MAG      | PL        | nM      | 0.709  | 0.349 | 0.237  | 0.0089 | 25.3 [22.8 - 28]       | 23.8 [21.2 - 26.8]      |
| 1-LG and 2-LG | MAG      | PL        | nM      | 0.209  | 0.456 | 0.104  | 0.849  | 260 [229 - 295]        | 222 [197 - 250]         |
| 1-OG and 2-OG | MAG      | PL        | nM      | 0.0184 | 0.75  | 0.0756 | 0.789  | 409 [358 - 467]        | 318 [284 - 355]         |
| Ibuprofen     | NSAID    | Treatment | nM      | 0.725  | 0.975 | 0.737  | 0.09   | 64.2 [38.6 - 107]      | 41 [21.4 - 78.4]        |
| Naproxen      | NSAID    | Treatment | nM      | 0.0959 | 0.66  | 0.225  | 0.0737 | 10.3 [5.31 - 19.9]     | 31.4 [7.51 - 132]       |
| Acetaminophen | NSAID    | Treatment | nM      | 0.905  | 0.868 | 0.475  | 0.778  | 5.14 [3.09 - 8.54]     | 5.06 [2.61 - 9.82]      |

#### Oxylipin ratios

|                                  |  |  |  |        |        |        |        |                        |                        |
|----------------------------------|--|--|--|--------|--------|--------|--------|------------------------|------------------------|
| 12,13-DiHOME/EpOME               |  |  |  | 0.0017 | 0.595  | 0.302  | 0.0001 | 2.07 [1.93 - 2.22]     | 1.6 [1.43 - 1.79]      |
| 9_10-DiHODE/9(10)-EpODE          |  |  |  | 0.475  | 0.228  | 0.777  | 0.0002 | 1.09 [0.87 - 1.36]     | 1.26 [0.861 - 1.84]    |
| 13-KODE/13-HODE                  |  |  |  | 0.984  | 0.333  | 0.182  | 0.0022 | 0.103 [0.0867 - 0.123] | 0.104 [0.0854 - 0.126] |
| 11,12/14,15-DiHETrE              |  |  |  | 0.0494 | 0.552  | 0.246  | 0.0029 | 0.851 [0.825 - 0.878]  | 0.809 [0.771 - 0.849]  |
| 14,15/11,12-DiHETrE              |  |  |  | 0.0494 | 0.552  | 0.246  | 0.0029 | 1.18 [1.14 - 1.21]     | 1.24 [1.18 - 1.3]      |
| Sum(DiHOME)/Sum(EpOME)           |  |  |  | 0.0156 | 0.606  | 0.519  | 0.0131 | 3.02 [2.8 - 3.26]      | 2.5 [2.24 - 2.78]      |
| 9,10-DiHOME/EpOME                |  |  |  | 0.0141 | 0.635  | 0.247  | 0.0567 | 11.7 [10 - 13.7]       | 8.97 [7.43 - 10.8]     |
| 11(12)/14(15)-EpETrE             |  |  |  | 0.636  | 0.34   | 0.0738 | 0.108  | 0.781 [0.499 - 1.22]   | 0.688 [0.422 - 1.12]   |
| 15_16-DiHODE/<br>15(16)-EpODE    |  |  |  | 0.0315 | 0.416  | 0.257  | 0.127  | 5.43 [5 - 5.89]        | 4.49 [3.98 - 5.05]     |
| 12-HEPE/12-HETE                  |  |  |  | 0.0303 | 0.552  | 0.278  | 0.161  | 0.137 [0.121 - 0.155]  | 0.11 [0.0896 - 0.135]  |
| 14_15-DiHETrE/ 14(15)-<br>EpETrE |  |  |  | 0.902  | 0.257  | 0.525  | 0.427  | 10.1 [7.66 - 13.4]     | 10.1 [7.3 - 14.1]      |
| Sum(HDoHEs)                      |  |  |  | 0.0032 | 0.385  | 0.212  | 0.0001 | 3.82 [3.37 - 4.34]     | 2.66 [2.19 - 3.24]     |
| 17_18_DiHETE+<br>19_20_DiHDoPe   |  |  |  | 0.0001 | 0.0944 | 0.645  | 0.0001 | 4.45 [3.88 - 5.11]     | 7.44 [6.3 - 8.78]      |
| Sum(DiHETrE/EpETrE)              |  |  |  | 0.316  | 0.387  | 0.748  | 0.102  | 20.1 [16.4 - 24.6]     | 17.1 [13.1 - 22.3]     |
| Sum(DiHODE)/Sum(EpODE)           |  |  |  | 0.051  | 0.537  | 0.242  | 0.272  | 5.12 [4.74 - 5.53]     | 4.34 [3.86 - 4.88]     |

#### Bile acids

|         |                         |                    |    |        |        |        |        |                      |                     |
|---------|-------------------------|--------------------|----|--------|--------|--------|--------|----------------------|---------------------|
| CA      | 1 <sup>o</sup> -BA      | Cyp27A1;<br>CYP8B1 | nM | 0.0321 | 0.359  | 0.417  | 0.0406 | 27.4 [20.8 - 36.2]   | 19.3 [13.6 - 27.4]  |
| CDCA    | 1 <sup>o</sup> -BA      | Cyp27A1            | nM | 0.978  | 0.212  | 0.677  | 0.158  | 38.7 [29.2 - 51.5]   | 46.7 [32.6 - 66.9]  |
| UDCA    | 2 <sup>o</sup> -BA      | Microbiome         | nM | 0.625  | 0.56   | 0.245  | 0.972  | 68.3 [46.5 - 100]    | 90.1 [61.4 - 132]   |
| DCA     | 2 <sup>o</sup> -BA      | Microbiome         | nM | 0.696  | 0.0157 | 0.316  | 0.799  | 219 [184 - 261]      | 177 [120 - 259]     |
| LCA     | 2 <sup>o</sup> -BA      | Microbiome         | nM | 0.411  | 0.228  | 0.797  | 0.293  | 32.2 [25.4 - 40.8]   | 29.3 [23 - 37.4]    |
| w-MCA   | 2 <sup>o</sup> -BA      | Cyp27A1            | nM | 0.836  | 0.185  | 0.0573 | 0.22   | 7.34 [4.85 - 11.1]   | 7.63 [5.46 - 10.7]  |
| b-MCA   | 2 <sup>o</sup> -BA      | Cyp27A1            | nM | 0.248  | 0.621  | 0.43   | 0.717  | 1.42 [0.924 - 2.2]   | 1.96 [1.32 - 2.91]  |
| TCA     | 1 <sup>o</sup> -BA Conj | BAT                | nM | 0.39   | 0.594  | 0.0999 | 0.0784 | 13.9 [11 - 17.5]     | 11.7 [8.1 - 16.9]   |
| TCDCA   | 1 <sup>o</sup> -BA Conj | BAT                | nM | 0.726  | 0.42   | 0.149  | 0.0007 | 28.4 [22.6 - 35.8]   | 30.3 [21.6 - 42.7]  |
| TUDCA   | 2 <sup>o</sup> -BA Conj | BAT                | nM | 0.0275 | 0.777  | 0.887  | 0.0001 | 1.07 [0.78 - 1.48]   | 1.92 [1.53 - 2.41]  |
| TDCA    | 2 <sup>o</sup> -BA Conj | BAT                | nM | 0.23   | 0.989  | 0.118  | 0.0019 | 12.8 [9.84 - 16.8]   | 13.7 [8.95 - 21]    |
| TLCA    | 2 <sup>o</sup> -BA Conj | BAT                | nM | 0.597  | 0.947  | 0.693  | 0.259  | 9.65 [7.95 - 11.7]   | 7.56 [5.18 - 11.1]  |
| GCA     | 1 <sup>o</sup> -BA Conj | BAT                | nM | 0.982  | 0.74   | 0.0467 | 0.0035 | 68.9 [56 - 84.8]     | 68.6 [51.6 - 91.1]  |
| GCDCA   | 1 <sup>o</sup> -BA Conj | BAT                | nM | 0.354  | 0.584  | 0.205  | 0.0001 | 316 [260 - 384]      | 367 [270 - 499]     |
| GUDCA   | 2 <sup>o</sup> -BA Conj | BAT                | nM | 0.453  | 0.607  | 0.193  | 0.0004 | 41 [32.9 - 51.2]     | 46.3 [32.8 - 65.4]  |
| GDCA    | 2 <sup>o</sup> -BA Conj | BAT                | nM | 0.0653 | 0.132  | 0.146  | 0.0001 | 157 [127 - 195]      | 186 [125 - 277]     |
| GHDCa   | 2 <sup>o</sup> -BA Conj | BAT                | nM | 0.228  | 0.335  | 0.936  | 0.571  | 0.891 [0.688 - 1.15] | 0.72 [0.53 - 0.979] |
| GLCA    | 2 <sup>o</sup> -BA Conj | BAT                | nM | 0.185  | 0.281  | 0.549  | 0.0003 | 15.4 [12.5 - 19]     | 21.8 [14.8 - 32.1]  |
| T-a-MCA | 2 <sup>o</sup> -BA Conj | BAT                | nM | 0.818  | 0.778  | 0.154  | 0.135  | 2.89 [2.4 - 3.49]    | 2.62 [1.9 - 3.63]   |

#### Bile acids ratios

|                         |  |  |  |        |        |        |        |                          |                         |
|-------------------------|--|--|--|--------|--------|--------|--------|--------------------------|-------------------------|
| CA/CDCA                 |  |  |  | 0.0008 | 0.788  | 0.179  | 0.0001 | 0.707 [0.571 - 0.876]    | 0.363 [0.271 - 0.487]   |
| GDCA/DCA                |  |  |  | 0.0031 | 0.43   | 0.405  | 0.0001 | 0.719 [0.604 - 0.856]    | 1.05 [0.836 - 1.33]     |
| TDCA/CA                 |  |  |  | 0.0056 | 0.244  | 0.82   | 0.0001 | 0.469 [0.309 - 0.711]    | 0.906 [0.517 - 1.59]    |
| GCA/CA                  |  |  |  | 0.0104 | 0.314  | 0.838  | 0.0001 | 2.52 [1.86 - 3.39]       | 4.13 [2.84 - 6.01]      |
| GDCA/CA                 |  |  |  | 0.0007 | 0.664  | 0.946  | 0.0001 | 5.76 [4.01 - 8.27]       | 12.5 [7.71 - 20.2]      |
| TDCA/TLCA               |  |  |  | 0.0114 | 0.829  | 0.0424 | 0.0003 | 1.33 [1.1 - 1.62]        | 1.81 [1.49 - 2.21]      |
| (GDCA+GLCA)/(TDCA+TLCA) |  |  |  | 0.01   | 0.0131 | 0.707  | 0.0003 | 7.04 [6.18 - 8.02]       | 9.61 [7.9 - 11.7]       |
| TCA/CA                  |  |  |  | 0.076  | 0.223  | 0.923  | 0.0004 | 0.506 [0.358 - 0.716]    | 0.711 [0.434 - 1.16]    |
| TDCA/DCA                |  |  |  | 0.1    | 0.0549 | 0.448  | 0.0019 | 0.0605 [0.0467 - 0.0783] | 0.0777 [0.0556 - 0.109] |
| DCA/CA                  |  |  |  | 0.0459 | 0.875  | 0.944  | 0.021  | 8.01 [5.8 - 11.1]        | 12 [7.89 - 18.1]        |
| GUDCA/UDCA              |  |  |  | 0.7    | 0.769  | 0.952  | 0.0584 | 0.546 [0.341 - 0.876]    | 0.515 [0.334 - 0.793]   |
| GLCA/CDCA               |  |  |  | 0.273  | 0.975  | 0.654  | 0.0617 | 0.397 [0.278 - 0.567]    | 0.487 [0.291 - 0.817]   |
| GCDCA/CDCA              |  |  |  | 0.491  | 0.519  | 0.584  | 0.0688 | 8.15 [6.21 - 10.7]       | 8.36 [5.68 - 12.3]      |
| GCA/GDCA                |  |  |  | 0.0679 | 0.0556 | 0.493  | 0.204  | 0.431 [0.357 - 0.519]    | 0.368 [0.277 - 0.49]    |
| w-MCA/UDCA              |  |  |  | 0.662  | 0.549  | 0.544  | 0.23   | 0.108 [0.0659 - 0.175]   | 0.0845 [0.054 - 0.132]  |
| GCDCA/GLCA              |  |  |  | 0.256  | 0.429  | 0.568  | 0.445  | 20.5 [16.2 - 26]         | 16.8 [11.9 - 23.7]      |
| w-MCA/T-a-MCA           |  |  |  | 0.431  | 0.353  | 0.476  | 0.529  | 3.16 [1.86 - 5.38]       | 2.86 [1.82 - 4.5]       |

|                                                                 |         |               |    |        |        |        |        |                         |                         |
|-----------------------------------------------------------------|---------|---------------|----|--------|--------|--------|--------|-------------------------|-------------------------|
| GDCA/GLCA                                                       |         |               |    | 0.988  | 0.61   | 0.224  | 0.676  | 9.92 [8.33 - 11.8]      | 8.53 [6.67 - 10.9]      |
| TLCA/CDCA                                                       |         |               |    | 0.651  | 0.674  | 0.821  | 0.734  | 0.249 [0.17 - 0.364]    | 0.169 [0.0992 - 0.287]  |
| T-a-MCA/CDCA                                                    |         |               |    | 0.913  | 0.35   | 0.363  | 0.929  | 0.0747 [0.0524 - 0.106] | 0.057 [0.0351 - 0.0926] |
| (GCA+TCA)/CA                                                    |         |               |    | 0.0148 | 0.175  | 0.839  | 0.0001 | 3.12 [2.3 - 4.23]       | 5.04 [3.4 - 7.47]       |
| (GLCA+TLCA)/LCA                                                 |         |               |    | 0.719  | 0.314  | 0.473  | 0.0657 | 1.08 [0.815 - 1.44]     | 1.11 [0.831 - 1.49]     |
| (TCA+GCA+TDCA+GDCA)/<br>(GUDCA+TUDCA+GLCA+<br>TLCA+TCDCA+GCDCA) |         |               |    | 0.809  | 0.456  | 0.45   | 0.705  | 0.637 [0.561 - 0.724]   | 0.606 [0.511 - 0.72]    |
| (TCDCA+GCDCA)/CDCA                                              |         |               |    | 0.479  | 0.45   | 0.549  | 0.0706 | 9.06 [6.88 - 11.9]      | 9.31 [6.3 - 13.7]       |
| (TUDAC+GUDCA)/UDCA                                              |         |               |    | 0.746  | 0.786  | 0.942  | 0.0635 | 0.589 [0.369 - 0.938]   | 0.54 [0.351 - 0.832]    |
| DCA/(LCA+UDCA)                                                  |         |               |    | 0.524  | 0.396  | 0.765  | 0.522  | 1.9 [1.42 - 2.55]       | 1.43 [0.971 - 2.1]      |
| LCA/CDCA                                                        |         |               |    | 0.451  | 0.585  | 0.483  | 0.859  | 0.66 [0.419 - 1.04]     | 0.589 [0.42 - 0.825]    |
| (TDCA+GDCA)/DCA                                                 |         |               |    | 0.0034 | 0.207  | 0.379  | 0.0001 | 0.794 [0.664 - 0.949]   | 1.17 [0.919 - 1.48]     |
| UDCA/CDCA                                                       |         |               |    | 0.691  | 0.49   | 0.847  | 0.329  | 1.39 [0.815 - 2.36]     | 1.94 [1.23 - 3.07]      |
| GLCA/LCA                                                        |         |               |    | 0.721  | 0.521  | 0.601  | 0.0867 | 0.711 [0.53 - 0.955]    | 0.749 [0.552 - 1.02]    |
| TCDCA/CDCA                                                      |         |               |    | 0.644  | 0.122  | 0.535  | 0.179  | 0.734 [0.53 - 1.01]     | 0.687 [0.433 - 1.09]    |
| TLCA/LCA                                                        |         |               |    | 0.961  | 0.0545 | 0.71   | 0.286  | 0.282 [0.2 - 0.396]     | 0.252 [0.182 - 0.347]   |
| TUDCA/UDCA                                                      |         |               |    | 0.746  | 0.949  | 0.997  | 0.234  | 2.83 [1.93 - 4.17]      | 2.04 [1.33 - 3.13]      |
| Steroids                                                        |         |               |    |        |        |        |        |                         |                         |
| CRTL                                                            | Steroid | eta-HSD; Cyp1 | nM | 0.597  | 0.719  | 0.676  | 0.439  | 252 [231 - 274]         | 207 [158 - 272]         |
| CRTN                                                            | Steroid | 11-beta-HSD   | nM | 0.188  | 0.426  | 0.294  | 0.13   | 46.6 [43.6 - 49.9]      | 37.4 [29.5 - 47.3]      |
| CRCTN                                                           | Steroid | Cyp11B1       | nM | 0.386  | 0.686  | 0.293  | 0.669  | 4.46 [3.84 - 5.18]      | 4.9 [3.82 - 6.27]       |
| 11-Deoxy-CTRL                                                   | Steroid | CYP8B1        | nM | 0.952  | 0.298  | 0.671  | 0.572  | 0.775 [0.701 - 0.857]   | 0.768 [0.601 - 0.98]    |
| DHEAS                                                           | Steroid |               | nM | 0.0057 | 0.595  | 0.705  | 0.0002 | 2000 [1410 - 2840]      | 1070 [726 - 1570]       |
| TEST                                                            | Steroid | 3-beta-HSD    | nM | 0.945  | 0.0016 | 0.209  | 0.0239 | 1.41 [1.1 - 1.81]       | 2.5 [1.63 - 3.85]       |
| 17OH-PROG                                                       | Steroid | 3-beta-HSD    | nM | 0.0517 | 0.338  | 0.985  | 0.0006 | 1.04 [0.872 - 1.24]     | 0.951 [0.761 - 1.19]    |
| Progesterone                                                    | Steroid | Sex Hormones  | nM | 0.0001 | 0.661  | 0.0876 | 0.0001 | 0.617 [0.542 - 0.701]   | 0.37 [0.317 - 0.432]    |
| Steroid ratios                                                  |         |               |    |        |        |        |        |                         |                         |
| Tes/Prog                                                        |         |               |    | 0.0021 | 0.0152 | 0.767  | 0.18   | 2.29 [1.75 - 3.01]      | 6.76 [4.34 - 10.5]      |
