# Supplementary material for: Association of plasma and CSF cytochrome P450, soluble epoxide hydrolase and ethanolamides metabolism with Alzheimer’s disease
Source: bioRxiv or medRxiv preprint supplement (doi:10.1101/2021.03.09.21252423), 2021-03-10
Supplement: Supplementary file [file media-4.pdf]

**Table S4.** The mean values and t-test and two-way ANOVA interaction p-values for all detected metabolites in CSF. P-values < 0.05 are colored red, p-values > 0.05 < 0.1 are colored orange.

| Metabolite information                              |                         |            |         | p-values              |                                      |                                    | Mean [95%CI] Using subjects with p of fasted >60% |                            |
|-----------------------------------------------------|-------------------------|------------|---------|-----------------------|--------------------------------------|------------------------------------|---------------------------------------------------|----------------------------|
| Metabolite name                                     | Chemical class          | Enzyme     | Units   | p-value AD vs Control | p-value Gender x Disease interaction | p-value Race x Disease interaction | Control mean [95%CI]                              | AD mean [95%CI]            |
| <b>Oxylipins, endocannabinoids, PUFAs and NSADs</b> |                         |            |         |                       |                                      |                                    |                                                   |                            |
| PGF2a                                               | PGs                     | COX2       | nM      | 0.0028                | 0.0964                               | 0.537                              | 0.0356 [0.0313 - 0.0404]                          | 0.0305 [0.0278 - 0.0335]   |
| F2-IsoP                                             | PGs                     | Auto-ox    | nM      | 0.105                 | 0.57                                 | 0.0295                             | 0.269 [0.256 - 0.284]                             | 0.295 [0.281 - 0.309]      |
| 12_13-DiHOME                                        | vic-Diol                | sEH        | nM      | 0.0008                | 0.435                                | 0.407                              | 0.0275 [0.0245 - 0.0308]                          | 0.0356 [0.0321 - 0.0394]   |
| 9_10-DiHOME                                         | vic-Diol                | sEH        | nM      | 0.0003                | 0.476                                | 0.161                              | 0.016 [0.014 - 0.0182]                            | 0.0218 [0.0196 - 0.0243]   |
| 15_16-DiHODE                                        | vic-Diol                | sEH        | nM      | 0.12                  | 0.8                                  | 0.922                              | 0.0765 [0.0667 - 0.0877]                          | 0.0735 [0.0662 - 0.0816]   |
| 14_15-DiHETrE                                       | vic-Diol                | sEH        | nM      | 0.501                 | 0.744                                | 0.674                              | 0.0461 [0.0433 - 0.0491]                          | 0.0473 [0.0445 - 0.0503]   |
| 11_12-DiHETrE                                       | vic-Diol                | sEH        | nM      | 0.0315                | 0.566                                | 0.477                              | 0.0179 [0.0166 - 0.0193]                          | 0.017 [0.0158 - 0.0184]    |
| 17_18-DiHETE                                        | vic-Diol                | sEH        | nM      | 0.34                  | 0.932                                | 0.942                              | 0.0905 [0.0784 - 0.104]                           | 0.0896 [0.0776 - 0.103]    |
| 14_15-DiHETE                                        | vic-Diol                | sEH        | nM      | 0.0022                | 0.939                                | 0.661                              | 0.0294 [0.0254 - 0.0339]                          | 0.023 [0.0195 - 0.0272]    |
| 19_20-DiHDoPE                                       | vic-Diol                | sEH        | nM      | 0.588                 | 0.128                                | 0.346                              | 0.0155 [0.014 - 0.0171]                           | 0.0176 [0.0162 - 0.0192]   |
| 13-HODE                                             | R-OH                    | LOX        | nM      | 0.67                  | 0.285                                | 0.244                              | 1.61 [1.56 - 1.66]                                | 1.6 [1.56 - 1.65]          |
| 9-HODE                                              | R-OH                    | LOX        | nM      | 0.517                 | 0.346                                | 0.119                              | 0.556 [0.535 - 0.577]                             | 0.542 [0.525 - 0.56]       |
| 13-HOTE                                             | R-OH                    | LOX        | nM      | 0.469                 | 0.0108                               | 0.583                              | 0.0497 [0.0468 - 0.0527]                          | 0.052 [0.0482 - 0.0561]    |
| 9-HOTE                                              | R-OH                    | LOX        | nM      | 0.966                 | 0.298                                | 0.591                              | 0.0121 [0.0113 - 0.013]                           | 0.0123 [0.0114 - 0.0132]   |
| 12(13)-EpOME                                        | Epox                    | CYP        | nM      | 0.0001                | 0.0414                               | 0.522                              | 0.215 [0.196 - 0.236]                             | 0.335 [0.304 - 0.369]      |
| 9(10)-EpOME                                         | Epox                    | CYP        | nM      | 0.0001                | 0.0303                               | 0.584                              | 0.219 [0.202 - 0.237]                             | 0.31 [0.277 - 0.348]       |
| 20-HETE                                             | R-OH                    | CYP        | nM      | 0.0791                | 0.539                                | 0.471                              | 0.138 [0.126 - 0.152]                             | 0.126 [0.118 - 0.135]      |
| LA                                                  | PUFA                    | Diet       | Rel Abs | 0.0001                | 0.377                                | 0.581                              | 0.296 [0.278 - 0.315]                             | 0.236 [0.224 - 0.249]      |
| ALA                                                 | PUFA                    | Diet       | Rel Abs | 0.0146                | 0.104                                | 0.739                              | 0.293 [0.276 - 0.31]                              | 0.265 [0.253 - 0.279]      |
| AA                                                  | PUFA                    | D5D        | Rel Abs | 0.0001                | 0.508                                | 0.948                              | 0.308 [0.287 - 0.329]                             | 0.247 [0.232 - 0.262]      |
| EPA                                                 | PUFA                    | D6D        | Rel Abs | 0.0001                | 0.648                                | 0.444                              | 0.28 [0.249 - 0.314]                              | 0.203 [0.184 - 0.224]      |
| DHA                                                 | PUFA                    | D6D        | Rel Abs | 0.0118                | 0.322                                | 0.663                              | 0.284 [0.261 - 0.308]                             | 0.257 [0.236 - 0.279]      |
| OEA                                                 | Acyl-EA                 | PLD        | nM      | 0.0001                | 0.489                                | 0.0418                             | 0.126 [0.116 - 0.137]                             | 0.0866 [0.0813 - 0.0922]   |
| LEA                                                 | Acyl-EA                 | PLD        | nM      | 0.0934                | 0.0299                               | 0.655                              | 0.24 [0.23 - 0.251]                               | 0.256 [0.246 - 0.267]      |
| DHEA                                                | Acyl-EA                 | PLD        | nM      | 0.813                 | 0.469                                | 0.758                              | 0.0136 [0.0119 - 0.0155]                          | 0.016 [0.0147 - 0.0173]    |
| <b>Oxylipin ratios</b>                              |                         |            |         |                       |                                      |                                    |                                                   |                            |
| 9(10)/12(13)-EpOME                                  |                         |            |         | 0.0001                | 0.401                                | 0.98                               | 1.02 [0.972 - 1.06]                               | 0.928 [0.9 - 0.956]        |
| 11,12/14,15-DiHETrE                                 |                         |            |         | 0.0009                | 0.56                                 |                                    | 0.389 [0.377 - 0.401]                             | 0.36 [0.347 - 0.373]       |
| 9,10/12,13-DiHOME                                   |                         |            |         | 0.558                 | 0.593                                |                                    | 0.582 [0.532 - 0.638]                             | 0.613 [0.576 - 0.653]      |
| 14,15/17,18-DiHETE                                  |                         |            |         | 0.171                 | 0.748                                |                                    | 0.326 [0.272 - 0.391]                             | 0.259 [0.214 - 0.314]      |
| 12,13-DiHOME/EpOME                                  |                         |            |         | 0.0615                | 0.875                                | 0.506                              | 0.128 [0.112 - 0.146]                             | 0.106 [0.0939 - 0.12]      |
| 14,15/11,12-DiHETrE                                 |                         |            |         | 0.0008                | 0.544                                | 0.46                               | 2.57 [2.5 - 2.65]                                 | 2.78 [2.68 - 2.88]         |
| 9,10-DiHOME/EpOME                                   |                         |            |         | 0.902                 | 0.656                                | 0.409                              | 0.0732 [0.0646 - 0.0831]                          | 0.0703 [0.0611 - 0.0809]   |
| EPA + DHA diols                                     |                         |            |         | 0.178                 | 0.82                                 | 0.801                              | 0.147 [0.133 - 0.161]                             | 0.145 [0.132 - 0.159]      |
| Sum(DiHOME)/Sum(EpOME)                              |                         |            |         | 0.248                 | 0.786                                | 0.474                              | 0.103 [0.0917 - 0.115]                            | 0.0902 [0.0795 - 0.102]    |
| Sum(DiHOMEs)                                        |                         |            |         | 0.0007                | 0.356                                | 0.267                              | 0.0449 [0.0402 - 0.0501]                          | 0.0584 [0.0529 - 0.0644]   |
| Sum(EpOMEs)                                         |                         |            |         | 0.0001                | 0.0688                               | 0.585                              | 0.437 [0.403 - 0.474]                             | 0.648 [0.584 - 0.718]      |
| Sum(LA Cyp+sEH)                                     |                         |            |         | 0.0001                | 0.0231                               | 0.407                              | 0.492 [0.455 - 0.531]                             | 0.723 [0.658 - 0.796]      |
| <b>Bile acids</b>                                   |                         |            |         |                       |                                      |                                    |                                                   |                            |
| CDCA                                                | 1 <sup>o</sup> -BA      | Cyp27A1    | nM      | 0.756                 | 0.234                                | 0.152                              | 1.06 [0.887 - 1.27]                               | 1.23 [1.06 - 1.42]         |
| UDCA                                                | 2 <sup>o</sup> -BA      | Microbiome | nM      | 0.425                 | 0.0021                               | 0.678                              | 0.699 [0.58 - 0.842]                              | 0.886 [0.719 - 1.09]       |
| DCA                                                 | 2 <sup>o</sup> -BA      | Microbiome | nM      | 0.601                 | 0.0787                               | 0.216                              | 1.81 [1.57 - 2.1]                                 | 1.99 [1.67 - 2.38]         |
| a-MCA                                               | 2 <sup>o</sup> -BA      | Cyp27A1    | nM      | 0.319                 | 0.751                                | 0.416                              | 0.0398 [0.0317 - 0.0499]                          | 0.033 [0.0263 - 0.0414]    |
| w-MCA                                               | 2 <sup>o</sup> -BA      | Cyp27A1    | nM      | 0.267                 | 0.36                                 | 0.0969                             | 0.0826 [0.0652 - 0.105]                           | 0.106 [0.0819 - 0.136]     |
| TCA                                                 | 1 <sup>o</sup> -BA Conj | BAT        | nM      | 0.291                 | 0.164                                | 0.182                              | 0.405 [0.336 - 0.487]                             | 0.503 [0.418 - 0.605]      |
| TCDCA                                               | 1 <sup>o</sup> -BA Conj | BAT        | nM      | 0.0552                | 0.75                                 | 0.303                              | 0.0797 [0.0675 - 0.094]                           | 0.0704 [0.0603 - 0.0822]   |
| TUDCA                                               | 2 <sup>o</sup> -BA Conj | BAT        | nM      | 0.0993                | 0.46                                 | 0.349                              | 0.00272 [0.0022 - 0.00336]                        | 0.00351 [0.00293 - 0.0042] |
| TDCA                                                | 2 <sup>o</sup> -BA Conj | BAT        | nM      | 0.878                 | 0.234                                | 0.0575                             | 0.0463 [0.0397 - 0.054]                           | 0.0459 [0.0381 - 0.0553]   |
| GCA                                                 | 1 <sup>o</sup> -BA Conj | BAT        | nM      | 0.98                  | 0.277                                | 0.0429                             | 0.907 [0.79 - 1.04]                               | 0.997 [0.862 - 1.15]       |
| GCDCA                                               | 1 <sup>o</sup> -BA Conj | BAT        | nM      | 0.267                 | 0.79                                 | 0.0913                             | 0.79 [0.691 - 0.902]                              | 0.808 [0.723 - 0.903]      |
| GUDCA                                               | 2 <sup>o</sup> -BA Conj | BAT        | nM      | 0.548                 | 0.872                                | 0.109                              | 0.0879 [0.0734 - 0.105]                           | 0.0992 [0.0833 - 0.118]    |
| GDCA                                                | 2 <sup>o</sup> -BA Conj | BAT        | nM      | 0.345                 | 0.17                                 | 0.0303                             | 0.367 [0.319 - 0.421]                             | 0.414 [0.352 - 0.488]      |

|                           |            |                |    |        |        |        |                             |                           |
|---------------------------|------------|----------------|----|--------|--------|--------|-----------------------------|---------------------------|
| GLCA                      | 2°-BA Conj | BAT            | nM | 0.0185 | 0.299  | 0.491  | 0.0278 [0.024 - 0.0321]     | 0.0368 [0.0319 - 0.0425]  |
| T-a-MCA                   | 2°-BA Conj | BAT            | nM | 0.0262 | 0.433  | 0.463  | 0.0221 [0.0186 - 0.0264]    | 0.0303 [0.0256 - 0.0358]  |
| Bile acids ratios         |            |                |    |        |        |        |                             |                           |
| (GDCA+GLCA)/(TDCA)        |            |                |    | 0.0495 | 0.578  | 0.549  | 8.88 [8.07 - 9.78]          | 10.5 [9.26 - 11.9]        |
| (GDCA+TDCA)/(TLCA+GLCA)   |            |                |    | 0.154  | 0.0513 | 0.0332 | 15.2 [12.8 - 18]            | 13 [10.8 - 15.5]          |
| (GDCA+TDCA)/(TUDCA+GUDCA) |            |                |    | 0.981  | 0.538  | 0.991  | 4.58 [3.73 - 5.62]          | 4.55 [3.66 - 5.66]        |
| (TCDCA+GCDCA)/CDCA        |            |                |    | 0.241  | 0.0782 | 0.841  | 0.831 [0.707 - 0.977]       | 0.727 [0.632 - 0.837]     |
| (TDCA+GDCA)/DCA           |            |                |    | 0.623  | 0.274  | 0.327  | 0.233 [0.205 - 0.265]       | 0.24 [0.211 - 0.272]      |
| (TDCA+TCDCA)/(GDCA+GCDCA) |            |                |    | 0.161  | 0.576  | 0.975  | 0.11 [0.101 - 0.119]        | 0.0968 [0.0875 - 0.107]   |
| (TUDAC+GUDCA)/UDCA        |            |                |    | 0.881  | 0.0525 | 0.347  | 0.132 [0.106 - 0.165]       | 0.118 [0.0925 - 0.151]    |
| DCA/(LCA+UDCA)            |            |                |    | 0.587  | 0.283  | 0.632  | 2.59 [2.15 - 3.13]          | 2.25 [1.81 - 2.78]        |
| GCA/GCDCA                 |            |                |    | 0.161  | 0.143  | 0.291  | 1.15 [1.05 - 1.26]          | 1.23 [1.13 - 1.35]        |
| GCA/GDCA                  |            |                |    | 0.666  | 0.671  | 0.966  | 2.47 [2.12 - 2.89]          | 2.41 [2.01 - 2.88]        |
| GCDCA/CDCA                |            |                |    | 0.268  | 0.0832 | 0.832  | 0.744 [0.635 - 0.872]       | 0.657 [0.572 - 0.755]     |
| GCDCA/GDCA                |            |                |    | 0.164  | 0.21   | 0.579  | 2.15 [1.85 - 2.51]          | 1.95 [1.66 - 2.29]        |
| GCDCA/GLCA                |            |                |    | 0.0029 | 0.533  | 0.0727 | 28.5 [24.2 - 33.4]          | 21.9 [18.8 - 25.6]        |
| GDCA/DCA                  |            |                |    | 0.647  | 0.212  | 0.249  | 0.202 [0.179 - 0.229]       | 0.208 [0.186 - 0.233]     |
| GDCA/GLCA                 |            |                |    | 0.161  | 0.0588 | 0.0376 | 13.2 [11.1 - 15.7]          | 11.3 [9.37 - 13.5]        |
| GLCA/CDCA                 |            |                |    | 0.129  | 0.0427 | 0.0693 | 0.0262 [0.021 - 0.0326]     | 0.0299 [0.0248 - 0.0362]  |
| GUDCA/UDCA                |            |                |    | 0.86   | 0.0606 | 0.34   | 0.126 [0.1 - 0.158]         | 0.112 [0.0874 - 0.143]    |
| T-a-MCA/CDCA              |            |                |    | 0.18   | 0.122  | 0.684  | 0.0209 [0.0161 - 0.027]     | 0.0246 [0.0196 - 0.031]   |
| TCDCA/CDCA                |            |                |    | 0.0996 | 0.104  | 0.759  | 0.0751 [0.0608 - 0.0927]    | 0.0572 [0.0469 - 0.0699]  |
| TCDCA/GCDCA               |            |                |    | 0.125  | 0.512  | 0.714  | 0.101 [0.0915 - 0.111]      | 0.0871 [0.0779 - 0.0974]  |
| TDCA/DCA                  |            |                |    | 0.708  | 0.369  | 0.458  | 0.0256 [0.0212 - 0.0308]    | 0.0231 [0.0188 - 0.0283]  |
| TDCA/GDCA                 |            |                |    | 0.204  | 0.589  | 0.822  | 0.126 [0.114 - 0.14]        | 0.111 [0.0976 - 0.126]    |
| TUDCA/UDCA                |            |                |    | 0.593  | 0.0018 | 0.717  | 0.00389 [0.00296 - 0.00513] | 0.00396 [0.003 - 0.00521] |
| UDCA/CDCA                 |            |                |    | 0.423  | 0.019  | 0.374  | 0.658 [0.531 - 0.816]       | 0.721 [0.588 - 0.885]     |
| w-MCA/T-a-MCA             |            |                |    | 0.863  | 0.184  | 0.379  | 3.73 [2.74 - 5.08]          | 3.49 [2.53 - 4.81]        |
| w-MCA/UDCA                |            |                |    | 0.705  | 0.265  | 0.2    | 0.118 [0.092 - 0.152]       | 0.119 [0.09 - 0.158]      |
| Steroids                  |            |                |    |        |        |        |                             |                           |
| CTRL                      | Steroid    | beta-HSD; Cyp1 | nM | 0.466  | 0.798  | 0.975  | 13.4 [12.6 - 14.4]          | 14.4 [13.7 - 15.2]        |
| CRTN                      | Steroid    | 11-beta-HSD    | nM | 0.0048 | 0.25   | 0.378  | 3.89 [3.67 - 4.13]          | 4.37 [4.16 - 4.6]         |
| CRCTN                     | Steroid    | Cyp11B1        | nM | 0.503  | 0.226  | 0.995  | 0.373 [0.338 - 0.412]       | 0.407 [0.37 - 0.449]      |
| 11-Deoxy-CTRL             | Steroid    | CYP8B1         | nM | 0.0803 | 0.0648 | 0.132  | 0.0451 [0.0414 - 0.0491]    | 0.0525 [0.0484 - 0.057]   |
| TEST                      | Steroid    | 3-beta-HSD     | nM | 0.49   | 0.245  | 0.827  | 0.0288 [0.0234 - 0.0355]    | 0.045 [0.0368 - 0.0551]   |
| 17OH-PROG                 | Steroid    | 3-beta-HSD     | nM | 0.109  | 0.408  | 0.525  | 0.0433 [0.0395 - 0.0476]    | 0.0464 [0.0426 - 0.0505]  |
