# Supplementary material for: Association of plasma and CSF cytochrome P450, soluble epoxide hydrolase and ethanolamides metabolism with Alzheimer’s disease
Source: bioRxiv or medRxiv preprint supplement (doi:10.1101/2021.03.09.21252423), 2021-03-10
Supplement: Supplementary file [file media-5.pdf]

**Table S5.** Variable importance in projection (VIP) scores for all plasma and CSF variables used for partial least square discriminant analysis (PLS-DA)

| Variable                  | Tissue | VIP  |
|---------------------------|--------|------|
| OEA/LEA                   | Plasam | 2.9  |
| DEA/LEA                   | Plasam | 2.54 |
| CSF_OEA/LEA               | CSF    | 2.48 |
| CSF_OEA                   | CSF    | 2.44 |
| DHEA/LEA                  | Plasam | 2.18 |
| 17_18-DiHETE              | Plasam | 2.16 |
| Progesterone              | Plasam | 1.97 |
| CSF_12(13)-EpOME          | CSF    | 1.95 |
| DEA/aLEA                  | Plasam | 1.95 |
| DEA                       | Plasam | 1.79 |
| DHEAS                     | Plasam | 1.79 |
| OEA                       | Plasam | 1.77 |
| AEA                       | Plasam | 1.75 |
| CSF_Sum(EpOMEs)           | CSF    | 1.74 |
| CSF_Sum(LA Cyp+sEH)       | CSF    | 1.74 |
| 17_18_DiHETE+19_20_DiHETE | Plasam | 1.74 |
| 9-HETE                    | Plasam | 1.74 |
| 12,13-DiHOME/EpOME 2      | Plasam | 1.71 |
| 4-HDoHE                   | Plasam | 1.71 |
| DHEA/aLEA                 | Plasam | 1.69 |
| Tes/Prog                  | Plasam | 1.67 |
| CSF_9(10)/12(13)-EpOME    | CSF    | 1.64 |
| DHEA                      | Plasam | 1.64 |
| CA/CDCA                   | Plasam | 1.6  |
| CSF_9(10)-EpOME           | CSF    | 1.58 |
| 14_15-DiHETrE             | Plasam | 1.55 |
| 9-HEPE                    | Plasam | 1.47 |
| 5-HETE                    | Plasam | 1.45 |
| 5-HEPE                    | Plasam | 1.45 |
| CSF_AA_RelAb              | CSF    | 1.43 |
| 12-HEPE                   | Plasam | 1.39 |
| Sum(HDoHEs)               | Plasam | 1.38 |
| 1-OG                      | Plasam | 1.37 |
| CSF_GLCA                  | CSF    | 1.36 |
| 9_12_13-TriHOME           | Plasam | 1.36 |
| DGLEA                     | Plasam | 1.35 |
| Sum(DiHOME)/Sum(EpOMEs)   | Plasam | 1.34 |
| 11_12-DiHETrE             | Plasam | 1.34 |
| CSF_PGF2a                 | CSF    | 1.31 |
| CSF_12,13-DiHOME/EpOMEs   | CSF    | 1.3  |
| 8-HETE                    | Plasam | 1.3  |

|                         |        |       |
|-------------------------|--------|-------|
| 2-OG                    | Plasam | 1.29  |
| 15_16-DiHODE/15(16)-EpC | Plasam | 1.28  |
| (GDCA+GLCA)/(TDCA+TLC/  | Plasam | 1.28  |
| 11-HETE                 | Plasam | 1.27  |
| CSF_GCDCA/GLCA          | CSF    | 1.26  |
| GDCA/CA                 | Plasam | 1.26  |
| CSF_LA_RelAb            | CSF    | 1.25  |
| 14-HDoHE                | Plasam | 1.25  |
| 9_10-e-DiHO             | Plasam | 1.23  |
| 12-HETE                 | Plasam | 1.22  |
| CSF_F2-IsoP             | CSF    | 1.18  |
| F2-IsoP                 | Plasam | 1.16  |
| 15-HEPE                 | Plasam | 1.16  |
| 1-LG                    | Plasam | 1.16  |
| CSF_(GDCA+GLCA)/(TDCA)  | CSF    | 1.14  |
| Sum(DiHODE)/Sum(EpODE   | Plasam | 1.13  |
| CSF_UDCA                | CSF    | 1.12  |
| CA                      | Plasam | 1.12  |
| Testosterone            | Plasam | 1.12  |
| GDCA/DCA                | Plasam | 1.11  |
| w-MCA/UDCA              | Plasam | 1.1   |
| CSF_Sum(DiHOME)/Sum(E   | CSF    | 1.09  |
| CSF_TEST                | CSF    | 1.09  |
| 15-HETE                 | Plasam | 1.09  |
| 2-LG                    | Plasam | 1.09  |
| CSF_14,15/17,18-DiHETE  | CSF    | 1.07  |
| (TDCA+GDCA)/DCA         | Plasam | 1.07  |
| LEA                     | Plasam | 1.07  |
| 13-HODE                 | Plasam | 1.06  |
| TUDCA                   | Plasam | 1.06  |
| CSF_UDCA/CDCA           | CSF    | 1.03  |
| CSF_EPA_RelAb           | CSF    | 1.03  |
| PGF2a                   | Plasam | 1.03  |
| (w)+a+b-MCA             | Plasam | 1.03  |
| AA_screen               | Plasam | 1.02  |
| CSF_TCDCA/GCDCA         | CSF    | 1.01  |
| CSF_11-Deoxy-CTRL       | CSF    | 1.01  |
| LCA/CDCA                | Plasam | 1.01  |
| PGE2                    | Plasam | 1     |
| 12_13-DiHOME            | Plasam | 0.999 |
| CSF_9_10-DiHOME         | CSF    | 0.986 |
| CSF_11,12/14,15-DiHETrE | CSF    | 0.975 |
| CSF_14,15/11,12-DiHETrE | CSF    | 0.971 |
| CSF_GUDCA/UDCA          | CSF    | 0.971 |
| 9,10-DiHOME/EpOME 2     | Plasam | 0.967 |
| GCA/CA                  | Plasam | 0.966 |
| 12-HEPE/12-HETE         | Plasam | 0.964 |

|                        |        |       |
|------------------------|--------|-------|
| CSF_(TUDAC+GUDCA)/UDCA | CSF    | 0.962 |
| 9-HODE                 | Plasam | 0.951 |
| (GCA+TCA)/CA           | Plasam | 0.95  |
| 9(10)-EpOME            | Plasam | 0.948 |
| TDCA/CA                | Plasam | 0.943 |
| LA_screen              | Plasam | 0.941 |
| CSF_TDCA/GDCA          | CSF    | 0.938 |
| GHDA                   | Plasam | 0.917 |
| EPEA_Screen            | Plasam | 0.912 |
| CSF_(TDCA+TCDCA)/(GDC  | CSF    | 0.881 |
| CSF_9,10-DiHOME/EpOME  | CSF    | 0.867 |
| GLCA                   | Plasam | 0.866 |
| TXB2                   | Plasam | 0.86  |
| TDCA/TLCA              | Plasam | 0.839 |
| (TUDAC+GUDCA)/UDCA     | Plasam | 0.836 |
| PGD2                   | Plasam | 0.835 |
| CSF_TCDCA              | CSF    | 0.799 |
| 5_6-DiHETrE            | Plasam | 0.791 |
| 12_13-DiHODE           | Plasam | 0.788 |
| CSF_GLCA/CDCA          | CSF    | 0.785 |
| CSF_GCDCA/GDCA         | CSF    | 0.784 |
| CSF_T-a-MCA            | CSF    | 0.777 |
| CSF_GDCA               | CSF    | 0.774 |
| CSF_DCA                | CSF    | 0.77  |
| CSF_20-HETE            | CSF    | 0.768 |
| NA-Gly                 | Plasam | 0.768 |
| GCA/GCDCA              | Plasam | 0.766 |
| GDCA                   | Plasam | 0.766 |
| CSF_DHA_RelAb          | CSF    | 0.759 |
| CSF_GCA/GDCA           | CSF    | 0.758 |
| w-MCA/T-a-MCA          | Plasam | 0.757 |
| CSF_9,10/12,13-DiHOME  | CSF    | 0.752 |
| DCA/(LCA+UDCA)         | Plasam | 0.747 |
| GLCA/CDCA              | Plasam | 0.733 |
| TLCA/CDCA              | Plasam | 0.724 |
| ALA_screen             | Plasam | 0.723 |
| 14,15/11,12-DiHETrE    | Plasam | 0.72  |
| 11,12/14,15-DiHETrE    | Plasam | 0.72  |
| TCA/CA                 | Plasam | 0.72  |
| CSF_17_18-DiHETE       | CSF    | 0.719 |
| CSF_13-HOTE            | CSF    | 0.715 |
| 2-AG                   | Plasam | 0.713 |
| 9_10-DiHODE/9(10)-EpOD | Plasam | 0.711 |
| GCA/GDCA               | Plasam | 0.705 |
| 8_9-DiHETrE            | Plasam | 0.705 |
| CSF_TCDCA/CDCA         | CSF    | 0.704 |
| DHA_screen             | Plasam | 0.703 |

|                           |        |       |
|---------------------------|--------|-------|
| EPA_screen                | Plasam | 0.701 |
| 15(16)-EpODE              | Plasam | 0.695 |
| 5_15-DiHETE               | Plasam | 0.681 |
| 11(12)-EpETrE             | Plasam | 0.679 |
| UDCA/CDCA                 | Plasam | 0.675 |
| DCA/CA                    | Plasam | 0.673 |
| CSF_CRTL                  | CSF    | 0.659 |
| NO-Gly                    | Plasam | 0.656 |
| 1-AG                      | Plasam | 0.653 |
| CSF_DHEA                  | CSF    | 0.644 |
| CSF_DCA/(LCA+UDCA)        | CSF    | 0.643 |
| 17-OH Prog                | Plasam | 0.634 |
| 13-KODE                   | Plasam | 0.621 |
| POEA_Screen               | Plasam | 0.62  |
| 12(13)-EpOME              | Plasam | 0.619 |
| CSF_TUDCA/UDCA            | CSF    | 0.616 |
| CSF_19_20-DiHDoPE         | CSF    | 0.616 |
| CSF_(GDCA+TDCA)/(TLCA+CSF |        | 0.613 |
| 9-HOTE                    | Plasam | 0.61  |
| GCDCA/CDCA                | Plasam | 0.604 |
| 9_10-DiHOME               | Plasam | 0.603 |
| CSF_ALA_RelAb             | CSF    | 0.599 |
| CSF_14_15-DiHETE          | CSF    | 0.588 |
| CSF_TDCA/DCA              | CSF    | 0.586 |
| CSF_TDCA/DCA 2            | CSF    | 0.586 |
| CSF_LEA                   | CSF    | 0.583 |
| CSF_EPA + DHA diols       | CSF    | 0.582 |
| CSF_CRCTN                 | CSF    | 0.582 |
| CSF_GDCA/GLCA             | CSF    | 0.581 |
| CSF_CRTN                  | CSF    | 0.58  |
| CSF_Sum(DiHOMEs)          | CSF    | 0.575 |
| (TCDCA+GCDCA)/CDCA        | Plasam | 0.574 |
| GCDCA                     | Plasam | 0.574 |
| GCDCA/GLCA                | Plasam | 0.573 |
| CSF_w-MCA/UDCA            | CSF    | 0.57  |
| 11(12)/14(15)-EpETrE      | Plasam | 0.565 |
| LCA                       | Plasam | 0.563 |
| CSF_a-MCA                 | CSF    | 0.562 |
| (TDCA+TCDCA)/(GDCA+GC     | Plasam | 0.541 |
| (GDCA+TDCA)/(TUDCA+GL     | Plasam | 0.53  |
| TLCA                      | Plasam | 0.528 |
| 13-HOTE                   | Plasam | 0.51  |
| TDCA/GDCA                 | Plasam | 0.508 |
| CSF_12_13-DiHOME          | CSF    | 0.507 |
| 9(10)-EpODE               | Plasam | 0.506 |
| TCDCA/GCDCA               | Plasam | 0.503 |
| CSF_DHEA/LEA              | CSF    | 0.496 |

|                            |        |       |
|----------------------------|--------|-------|
| CSF_(GDCA+TDCA)/(TUDC, CSF |        | 0.495 |
| CSF_w-MCA                  | CSF    | 0.493 |
| Cortisone                  | Plasam | 0.487 |
| CSF_13-HODE                | CSF    | 0.477 |
| CSF_T-a-MCA/CDCA           | CSF    | 0.455 |
| TDCA/DCA                   | Plasam | 0.443 |
| CSF_TUDCA                  | CSF    | 0.442 |
| TCA                        | Plasam | 0.437 |
| T-a-MCA/CDCA               | Plasam | 0.436 |
| CSF_9-HODE                 | CSF    | 0.434 |
| UDCA                       | Plasam | 0.397 |
| aLEA                       | Plasam | 0.395 |
| (GLCA+TLCA)/LCA            | Plasam | 0.39  |
| w+a+(b)-MCA                | Plasam | 0.373 |
| TCDCA/CDCA                 | Plasam | 0.371 |
| GUDCA                      | Plasam | 0.369 |
| CDCA                       | Plasam | 0.368 |
| CSF_(TCDCA+GCDCA)/CDC CSF  |        | 0.345 |
| 19_20-DiHDoPE              | Plasam | 0.343 |
| CSF_15_16-DiHODE           | CSF    | 0.335 |
| GDCA/GLCA                  | Plasam | 0.331 |
| GCA                        | Plasam | 0.329 |
| CSF_GCDCA/CDCA             | CSF    | 0.323 |
| TDCA                       | Plasam | 0.323 |
| CSF_11_12-DiHETrE          | CSF    | 0.309 |
| Cortisol                   | Plasam | 0.302 |
| GCDCA/GDCA                 | Plasam | 0.299 |
| (GDCA+TDCA)/(TLCA+GLC/     | Plasam | 0.29  |
| CSF_GCDCA                  | CSF    | 0.273 |
| 15_16-DiHODE               | Plasam | 0.269 |
| Cortexolone                | Plasam | 0.263 |
| CSF_GUDCA                  | CSF    | 0.247 |
| (TCA+GCA+TDCA+GDCA)/(      | Plasam | 0.247 |
| T-w+(a)+b-MCA              | Plasam | 0.247 |
| CSF_TDCA                   | CSF    | 0.222 |
| CSF_9-HOTE                 | CSF    | 0.218 |
| 9_10-DiHODE                | Plasam | 0.214 |
| CSF_GCA                    | CSF    | 0.213 |
| 14_15-DiHETrE/14(15)-EpI   | Plasam | 0.213 |
| CSF_CDCA                   | CSF    | 0.196 |
| 14(15)-EpETrE              | Plasam | 0.174 |
| CSF_GDCA/DCA               | CSF    | 0.158 |
| CSF_(TDCA+GDCA)/DCA        | CSF    | 0.156 |
| DCA                        | Plasam | 0.146 |
| TCDCA                      | Plasam | 0.13  |
| CSF_GCA/GCDCA              | CSF    | 0.122 |
| corticosterone             | Plasam | 0.12  |

|                     |        |        |
|---------------------|--------|--------|
| 13-KODE/13-HODE     | Plasam | 0.113  |
| CSF_w-MCA/T-a-MCA   | CSF    | 0.111  |
| CSF_14_15-DiHETrE   | CSF    | 0.109  |
| CSF_17OH-PROG       | CSF    | 0.106  |
| CSF_TCA             | CSF    | 0.0631 |
| Sum(DiHETrE/EpETrE) | Plasam | 0.0621 |
