# Supplementary material for: Association of plasma and CSF cytochrome P450, soluble epoxide hydrolase and ethanolamides metabolism with Alzheimer’s disease
Source: bioRxiv or medRxiv preprint supplement (doi:10.1101/2021.03.09.21252423), 2021-03-10
Supplement: Supplementary file [file media-6.pdf]

**Table S6.** Stepwise logistic model predicting AD status using plasma, CSF or both plasma and CSF metabolites. Stepwise analysis was performed with the maximal validation  $r^2$  as the model stopping criteria, or if an additional step increased the BIC. Model stopping point for each analysis is highlighted.

| Step                  | Parameter              | L-R<br>ChiSquare | Sig Prob      | Entry<br>ChiSquare | Entry "Sig<br>Prob" | RSquare      | AICc        | BIC         | RSquare<br>Validation |
|-----------------------|------------------------|------------------|---------------|--------------------|---------------------|--------------|-------------|-------------|-----------------------|
| <b>Plasma</b>         |                        |                  |               |                    |                     |              |             |             |                       |
| 1                     | DEA/LEA                | 32               | 0.0001        | 27.8               | 1.36E-07            | 0.219        | 118         | 124         | 0.153                 |
| 2                     | OEA/LEA                | 16.7             | 0.0001        | 15.1               | 1.03E-04            | 0.333        | 104         | 112         | 0.425                 |
| 3                     | 12,13-DiHOME/EpOME     | 11.5             | 0.0007        | 10.5               | 1.21E-03            | 0.412        | 94.4        | 105         | 0.469                 |
| 4                     | 14_15-DiHETrE          | 11.5             | 0.0007        | 11.3               | 7.95E-04            | 0.491        | 85.1        | 97.9        | 0.512                 |
| 5                     | 9_12_13-TriHOME        | 7.07             | 0.0078        | 6.46               | 0.0111              | 0.539        | 80.2        | 95.6        | 0.559                 |
| 6                     | <b>CA/CDCA</b>         | <b>4.87</b>      | <b>0.0274</b> | <b>4.54</b>        | <b>0.0331</b>       | <b>0.572</b> | <b>77.7</b> | <b>95.4</b> | 0.62                  |
| 7                     | 13-KODE                | 3.03             | 0.0817        | 3.02               | 0.0824              | 0.593        | 77          | 97.1        | 0.65                  |
| <b>CSF</b>            |                        |                  |               |                    |                     |              |             |             |                       |
| 1                     | CSF_OEA/LEA            | 43.7             | 0.0001        | 39.1               | 3.96E-10            | 0.154        | 244         | 251         | 0.0935                |
| 2                     | CSF_12(13)-EpOME       | 25.8             | 0.0001        | 24                 | 9.75E-07            | 0.245        | 221         | 231         | 0.13                  |
| 3                     | CSF_9(10)-EpOME        | 9.26             | 0.0023        | 8.86               | 0.00292             | 0.277        | 213         | 227         | 0.152                 |
| 4                     | <b>CSF_GLCA</b>        | <b>7.46</b>      | <b>0.0063</b> | <b>7.33</b>        | <b>0.00677</b>      | <b>0.304</b> | <b>208</b>  | <b>224</b>  | 0.167                 |
| 5                     | CSF_12_13-DiHOME       | 3.72             | 0.0537        | 3.6                | 0.0577              | 0.317        | 207         | 226         | 0.183                 |
| <b>CSF and plasma</b> |                        |                  |               |                    |                     |              |             |             |                       |
| 1                     | DEA/LEA                | 32               | 0.0001        | 27.8               | 1.36E-07            | 0.219        | 118         | 124         | 0.153                 |
| 2                     | CSF_OEA/LEA            | 17.4             | 0.0001        | 16.7               | 4.36E-05            | 0.337        | 103         | 111         | 0.18                  |
| 3                     | DHEA/LEA               | 8.11             | 0.0044        | 7.5                | 6.19E-03            | 0.393        | 97.2        | 108         | 0.284                 |
| 4                     | 17_18-DiHETE           | 6.35             | 0.0117        | 6.29               | 1.22E-02            | 0.436        | 93          | 106         | 0.384                 |
| 5                     | <b>9_12_13-TriHOME</b> | <b>6.14</b>      | <b>0.0132</b> | <b>5.77</b>        | <b>0.0163</b>       | <b>0.478</b> | <b>89.1</b> | <b>104</b>  | 0.42                  |
| 6                     | CA/CDCA                | 1.54             | 0.214         | 1.53               | 0.216               | 0.489        | 89.9        | 108         | 0.473                 |
